# Supplementary material for: The Clinical Burden of Clostridioides difficile in Ontario, Canada
Source: PubMed Central journal article supplement — Open Forum Infect Dis. 2019 Dec 14;7(2):ofz523. doi: 10.1093/ofid/ofz523 (PMC6993863; doi:10.1093/ofid/ofz523), 2019-12-14
Supplement: ofz523_suppl_supplementary_tables.pdf [file ofz523_suppl_supplementary_tables.pdf]

Supplemental Table 1a: Comparison of outcomes by risk factors in ACH-associated/ACH-onset CDI cohort and matched controls\*

| <i>Cohort</i>                                        | 30-day all-cause re-hospitalization |                | 30-day all-cause mortality post-discharge |                  | 180-day all-cause mortality post-discharge |                   |
|------------------------------------------------------|-------------------------------------|----------------|-------------------------------------------|------------------|--------------------------------------------|-------------------|
|                                                      | CDI cohort                          | Non-CDI cohort | CDI Cohort                                | Non-CDI cohort   | CDI cohort                                 | Non-CDI cohort    |
| <b>N</b>                                             | <b>1,256</b>                        | <b>141</b>     | <b>2,013</b>                              | <b>10,847</b>    | <b>5,595</b>                               | <b>14,878</b>     |
| <b>Age group (years)</b>                             |                                     |                |                                           |                  |                                            |                   |
| 18-44                                                | **                                  | **             | 10<br>(0.5%)                              | 54<br>(0.5%)     | 30<br>(0.5%)                               | 72<br>(0.5%)      |
| 45-64                                                | 299<br>(23.8%)                      | 15<br>(10.6%)  | 192<br>(9.5%)                             | 1,032<br>(9.5%)  | 598<br>(10.7%)                             | 1,408<br>(9.5%)   |
| 65-74                                                | 252<br>(20.1%)                      | 25<br>(17.7%)  | 372<br>(18.5%)                            | 1,862<br>(17.2%) | 1,000<br>(17.9%)                           | 2,486<br>(16.7%)  |
| 75-84                                                | 406<br>(32.3%)                      | 55<br>(39.0%)  | 746<br>(37.1%)                            | 4,242<br>(39.1%) | 2,130<br>(38.1%)                           | 5,837<br>(39.2%)  |
| 85+                                                  | 242<br>(19.3)                       | 45<br>(31.9%)  | 693<br>(34.4%)                            | 3,657<br>(33.7%) | 1,837<br>(32.8%)                           | 5,075<br>(34.1%)  |
| <b>Sex</b>                                           |                                     |                |                                           |                  |                                            |                   |
| Female                                               | 620<br>(49.4%)                      | 74<br>(52.5%)  | 990<br>(49.2%)                            | 5,256<br>(48.5%) | 2,783<br>(49.7%)                           | 7,309<br>(49.1%)  |
| Male                                                 | 636<br>(50.6%)                      | 67<br>(47.5%)  | 1,023<br>(50.8%)                          | 5,591<br>(51.5%) | 2,812<br>(50.3%)                           | 7,569<br>(50.9%)  |
| <b>LTCF resident</b>                                 | 64<br>(5.1%)                        | 21<br>(14.9%)  | 204<br>(10.1%)                            | 1,677<br>(15.5%) | 429<br>(7.7%)                              | 2,186<br>(14.7%)  |
| <b>Healthcare exposure in 90 days prior to onset</b> | 483<br>(38.5%)                      | 60<br>(42.6%)  | 764<br>(38.0%)                            | 3,578<br>(33.0%) | 2,094<br>(37.4%)                           | 4,952<br>(33.3%)  |
| <b>Healthcare exposure in year prior to onset</b>    | 742<br>(59.1%)                      | 83<br>(58.9%)  | 1,107<br>(55.0%)                          | 5,633<br>(51.9%) | 3,053<br>(54.6%)                           | 7,770<br>(52.2%)  |
| <b>Antibiotic use in 30 days prior to onset</b>      | 312<br>(24.8%)                      | 37<br>(26.2%)  | 621<br>(30.8%)                            | 2,596<br>(23.9%) | 1,614<br>(28.8%)                           | 3,482<br>(23.4%)  |
| <b>Comorbidities</b>                                 |                                     |                |                                           |                  |                                            |                   |
| CVD                                                  | 850<br>(67.7%)                      | 106<br>(75.2%) | 1,380<br>(68.6%)                          | 7,453<br>(68.7%) | 3,847<br>(68.8%)                           | 10,220<br>(68.7%) |
| COPD                                                 | 153<br>(12.2%)                      | 16<br>(11.3%)  | 278<br>(13.8%)                            | 1,528<br>(14.1%) | 696<br>(12.4%)                             | 2,044<br>(13.7%)  |
| CHF                                                  | 280<br>(22.3%)                      | 29<br>(20.6%)  | 441<br>(21.9%)                            | 2,301<br>(21.2%) | 1,197<br>(21.4%)                           | 3,134<br>(21.1%)  |
| Diabetes                                             | 123                                 | 9              | 185                                       | 966              | 512                                        | 1,332             |

|                                |                |               |                |                  |                  |                  |
|--------------------------------|----------------|---------------|----------------|------------------|------------------|------------------|
|                                | (9.8%)         | (6.4%)        | (9.2%)         | (8.9%)           | (9.2%)           | (9.0%)           |
| Renal disease                  | 299<br>(23.8%) | 39<br>(27.7%) | 477<br>(23.7%) | 1,947<br>(17.9%) | 1,329<br>(23.8%) | 2,659<br>(17.9%) |
| Liver disease                  | 94<br>(7.5%)   | 6<br>(4.3%)   | 131<br>(6.5%)  | 554<br>(5.1%)    | 335<br>(6.0%)    | 739<br>(5.0%)    |
| Cancer                         | 223<br>(17.8%) | 24<br>(17.0%) | 369<br>(18.3%) | 2,264<br>(20.9%) | 1,036<br>(18.5%) | 3,222<br>(21.7%) |
| Pulmonary circulatory disorder | 53<br>(4.2%)   | 9<br>(6.4%)   | 86<br>(4.3%)   | 404<br>(3.7%)    | 218<br>(3.9%)    | 594<br>(4.0%)    |
| Valvular disease               | 96<br>(7.6%)   | 7<br>(5.0%)   | 134<br>(6.7%)  | 714<br>(6.6%)    | 362<br>(6.5%)    | 962<br>(6.5%)    |
| Inflammatory bowel disease     | **             | **            | 57<br>(2.8%)   | 203<br>(1.9%)    | 136<br>(2.4%)    | 280<br>(1.9%)    |

\*Shaded cells denote statistically significant differences ( $p$ -value  $\leq 0.05$ ) between the CDI cohort and their matched controls

\*\* Exact counts were low, and therefore withheld from analysis due to privacy concerns

Supplemental Table 1b: Risk factors for all-cause re-hospitalization and mortality in ACH-associated/ACH-onset CDI cohort\*

|                                                      | 30-day all-cause re-hospitalization |         | 30-day all-cause mortality post-discharge |         | 180-day all-cause mortality post-discharge |         |
|------------------------------------------------------|-------------------------------------|---------|-------------------------------------------|---------|--------------------------------------------|---------|
|                                                      | OR                                  | P-Value | OR                                        | P-Value | OR                                         | P-Value |
| <b>Age group (years)</b>                             |                                     |         |                                           |         |                                            |         |
| 18-44 vs 85+                                         | 2.15 (1.59, 2.92)                   | <.0001  | 0.10 (0.07, 1.16)                         | <.0001  | 0.14 (0.10, 0.20)                          | <.0001  |
| 45-64 vs 85+                                         | 1.87 (1.56, 2.23)                   | <.0001  | 0.42 (0.38, 0.47)                         | <.0001  | 0.47 (0.43, 0.52)                          | <.0001  |
| 65-74 vs 85+                                         | 1.24 (1.04, 1.49)                   | 0.0178  | 0.60 (0.55, 0.65)                         | <.0001  | 0.63 (0.58, 0.68)                          | <.0001  |
| 75-84 vs 85+                                         | 1.16 (0.99, 1.37)                   | 0.065   | 0.79 (0.74, 0.84)                         | <.0001  | 0.81 (0.76, 0.86)                          | <.0001  |
| <b>Sex (reference: male)</b>                         | 0.99 (0.89, 1.11)                   | 0.88    | 0.85 (0.80, 0.90)                         | <.0001  | 0.88 (0.83, 0.92)                          | <.0001  |
| <b>LTCF resident</b>                                 | 1.07 (0.83, 1.39)                   | 0.58    | 1.21 (1.08, 1.35)                         | 0.0009  | 1.26 (1.14, 1.39)                          | <.0001  |
| <b>Healthcare exposure in 90 days prior to onset</b> | 0.99 (0.85, 1.15)                   | 0.86    | 1.14 (1.04, 1.24)                         | 0.0032  | 1.14 (1.05, 1.22)                          | 0.0009  |
| <b>Healthcare exposure in year prior to onset</b>    | 1.32 (1.13, 1.54)                   | 0.0005  | 1.00 (0.92, 1.09)                         | 0.92    | 1.01 (0.94, 1.09)                          | 0.83    |
| <b>Antibiotic use in 30 days prior to onset</b>      | 0.93 (0.81, 1.06)                   | 0.25    | 1.09 (1.02, 1.16)                         | 0.014   | 1.09 (1.03, 1.16)                          | 0.003   |
| <b>Comorbidities</b>                                 |                                     |         |                                           |         |                                            |         |
| CVD                                                  | 1.16 (1.02, 1.34)                   | 0.029   | 0.99 (0.93, 1.06)                         | 0.84    | 1.00 (0.94, 1.07)                          | 0.93    |
| COPD                                                 | 0.99 (0.83, 1.17)                   | 0.89    | 1.04 (0.96, 1.14)                         | 0.35    | 1.02 (0.94, 1.10)                          | 0.61    |
| CHF                                                  | 1.26 (1.09, 1.46)                   | 0.0019  | 1.08 (1.00, 1.16)                         | 0.045   | 1.09 (1.02, 1.17)                          | 0.0094  |
| Diabetes                                             | 0.99 (0.82, 1.20)                   | 0.93    | 0.97 (0.88, 1.07)                         | 0.54    | 1.00 (0.92, 1.09)                          | 0.99    |
| Renal disease                                        | 1.16 (1.01, 1.33)                   | 0.036   | 1.16 (1.08, 1.25)                         | <.0001  | 1.17 (1.10, 1.24)                          | <.0001  |
| Liver disease                                        | 1.21 (0.97, 1.49)                   | 0.089   | 1.39 (1.23, 1.57)                         | <.0001  | 1.34 (1.20, 1.50)                          | <.0001  |
| Cancer                                               | 1.08 (0.93, 1.25)                   | 0.32    | 1.17 (1.08, 1.27)                         | <.0001  | 1.24 (1.16, 1.33)                          | <.0001  |
| Pulmonary circulatory disorder                       | 1.17 (0.88, 1.54)                   | 0.28    | 1.13 (0.97, 1.31)                         | 0.13    | 1.16 (1.02, 1.32)                          | 0.028   |
| Valvular disease                                     | 1.30 (1.05, 1.61)                   | 0.017   | 1.03 (0.91, 1.16)                         | 0.66    | 1.05 (0.94, 1.17)                          | 0.38    |
| Inflammatory bowel disease                           | 1.21 (0.91, 1.59)                   | 0.18    | 0.79 (0.66, 0.96)                         | 0.018   | 0.85 (0.72, 0.99)                          | 0.049   |

\*Shaded cells denote the statistical significance (p-value ≤ 0.05) of ORs

Supplemental Table 2a: Comparison of outcomes by risk factors in LTCF-associated/LTCF-onset CDI cohort and matched controls\*\*~

| Cohort                                        | 30-day all-cause mortality post-admission |                | 180-day all-cause mortality post-admission |                |
|-----------------------------------------------|-------------------------------------------|----------------|--------------------------------------------|----------------|
|                                               | CDI cohort                                | Non-CDI cohort | CDI cohort                                 | Non-CDI cohort |
| <b>N</b>                                      | <b>234</b>                                | <b>59</b>      | <b>333</b>                                 | <b>173</b>     |
| <b>Age group (years)</b>                      |                                           |                |                                            |                |
| 18-44                                         | 0<br>(0%)                                 | 0<br>(0.0%)    | 0<br>(0.0%)                                | 0<br>(0%)      |
| 45-64                                         | **                                        | 0<br>(0%)      | **                                         | 0<br>(0%)      |
| 65-74                                         | 13<br>(5.6%)                              | **             | 19<br>(5.7%)                               | 8<br>(4.6%)    |
| 75-84                                         | 70<br>(29.9%)                             | 19<br>(32.2%)  | 101<br>(30.3%)                             | 55<br>(31.8%)  |
| 85+                                           | 149<br>(63.7%)                            | 37<br>(62.7%)  | 211<br>(63.4%)                             | 101<br>(58.4%) |
| <b>Sex</b>                                    |                                           |                |                                            |                |
| Female                                        | 157<br>(67.1%)                            | 39<br>(66.1%)  | 218<br>(65.5%)                             | 101<br>(58.4%) |
| Male                                          | 77<br>(32.9%)                             | 20<br>(33.9%)  | 115<br>(34.5%)                             | 72<br>(41.6%)  |
| Healthcare exposure in 90 days prior to onset | 6<br>(2.6%)                               | **             | 10<br>(3.0%)                               | **             |
| Healthcare exposure in year prior to onset    | 107<br>(45.7%)                            | 20<br>(33.9%)  | 150<br>(45.0%)                             | 55<br>(31.8%)  |
| Antibiotic use in 30 days prior to onset      | 68<br>(29.1%)                             | **             | 92<br>(27.6%)                              | 8<br>(4.6%)    |
| <b>Comorbidities</b>                          |                                           |                |                                            |                |
| CVD                                           | 168<br>(71.8%)                            | 48<br>(81.4%)  | 234<br>(70.3%)                             | 124<br>(71.7%) |
| COPD                                          | 29<br>(12.4%)                             | 11<br>(18.6%)  | 45<br>(13.5%)                              | 26<br>(15.0%)  |
| CHF                                           | 45<br>(19.2%)                             | 14<br>(23.7%)  | 62<br>(18.6%)                              | 40<br>(23.1%)  |
| Diabetes                                      | 21<br>(9.0%)                              | 7<br>(11.9%)   | 35<br>(10.5%)                              | 16<br>(9.2%)   |
| Renal disease                                 | 41                                        | 15             | 56                                         | 26             |

|                                | (17.5%)     | (25.4%)   | (16.8%)      | (15.0%)      |
|--------------------------------|-------------|-----------|--------------|--------------|
| Liver disease                  | 8<br>(3.4%) | **        | 13<br>(3.9%) | **           |
| Cancer                         | 7<br>(3.0%) | **        | 14<br>(4.2%) | 17<br>(9.8%) |
| Pulmonary circulatory disorder | 7<br>(3.0%) | 0<br>(0%) | 9<br>(2.7%)  | 0<br>(0%)    |
| Valvular disease               | **          | **        | 8<br>(2.4%)  | 11<br>(6.4%) |
| Inflammatory bowel disease     | **          | **        | 8<br>(2.4%)  | **           |

\*Shaded cells denote statistically significant differences (p-value  $\leq 0.05$ ) between the CDI cohort and their matched controls

\*\*Exact counts were low, and therefore withheld from analysis due to privacy concerns

~Results for 30-day all-cause re-hospitalization are not displayed due to low numbers

Supplementary Table 2b: Risk factors for all-cause re-hospitalization and mortality in LTCF-associated/LTCF-onset CDI cohort\*

|                                                      | 30-day all-cause re-hospitalization |         | 30-day all-cause mortality post-admission |         | 180-day all-cause mortality post-admission |         |
|------------------------------------------------------|-------------------------------------|---------|-------------------------------------------|---------|--------------------------------------------|---------|
|                                                      | OR                                  | P-Value | OR                                        | P-Value | OR                                         | P-Value |
| <b>Age group (years)</b>                             |                                     |         |                                           |         |                                            |         |
| 18-44 vs 85+                                         | -                                   | -       | 0.48 (0.12, 1.99)                         | 0.31    | 0.33 (0.08, 1.35)                          | 0.12    |
| 45-64 vs 85+                                         | 1.86 (0.75, 4.59)                   | 0.18    | 0.63 (0.35, 1.11)                         | 0.11    | 0.63 (0.39, 1.01)                          | 0.056   |
| 65-74 vs 85+                                         | 0.67 (0.30, 1.52)                   | 0.34    | 0.82 (0.61, 1.09)                         | 0.18    | 0.82 (0.64, 1.04)                          | 0.10    |
| 75-84 vs 85+                                         | -                                   | -       | -                                         | -       | -                                          | -       |
| <b>Sex (reference: male)</b>                         | 0.45 (0.22, 0.90)                   | 0.025   | 0.98 (0.74, 1.30)                         | 0.89    | 0.90 (0.71, 1.14)                          | 0.38    |
| <b>Healthcare exposure in 90 days prior to onset</b> | -                                   | -       | 1.39 (0.66, 2.90)                         | 0.38    | 1.29 (0.67, 2.48)                          | 0.45    |
| <b>Healthcare exposure in year prior to onset</b>    | 0.87 (0.43, 1.75)                   | 0.60    | 1.05 (0.80, 1.39)                         | 0.71    | 1.04 (0.82, 1.31)                          | 0.75    |
| <b>Antibiotic use in 30 days prior to onset</b>      | 1.24 (0.60, 2.57)                   | 0.55    | 1.02 (0.77, 1.37)                         | 0.88    | 0.99 (0.77, 1.26)                          | 0.91    |
| <b>Comorbidities</b>                                 |                                     |         |                                           |         |                                            |         |
| CVD                                                  | 1.36 (0.59, 3.10)                   | 0.47    | 1.16 (0.85, 1.58)                         | 0.35    | 1.07 (0.83, 1.39)                          | 0.59    |
| COPD                                                 | 0.38 (0.09, 1.61)                   | 0.19    | 0.90 (0.60, 1.34)                         | 0.62    | 0.99 (0.72, 1.37)                          | 0.96    |
| CHF                                                  | 1.03 (0.44, 2.42)                   | 0.94    | 0.98 (0.69, 1.41)                         | 0.94    | 0.98 (0.72, 1.32)                          | 0.88    |
| Diabetes                                             | 1.60 (0.65, 3.97)                   | 0.31    | 0.78 (0.49, 1.22)                         | 0.27    | 0.94(0.66, 1.34)                           | 0.72    |
| Renal disease                                        | 1.03 (0.43, 2.48)                   | 0.94    | 1.03 (0.72, 1.48)                         | 0.86    | 0.97 (0.71, 1.32)                          | 0.85    |
| Liver disease                                        | 1.97 (0.54, 7.11)                   | 0.30    | 1.16 (0.60, 2.25)                         | 0.66    | 1.00 (0.55, 1.81)                          | 0.99    |
| Cancer                                               | 1.03 (0.22, 4.78)                   | 0.97    | 0.83 (0.41, 1.71)                         | 0.62    | 0.99 (0.57, 1.71)                          | 0.97    |
| Pulmonary circulatory disorder                       | 2.50 (0.83, 7.53)                   | 0.10    | 0.92 (0.43, 1.98)                         | 0.83    | 0.85 (0.43, 1.67)                          | 0.64    |
| Valvular disease                                     | 1.88 (0.23, 15.25)                  | 0.55    | 1.09 (0.43, 2.75)                         | 0.86    | 1.36 (0.65, 2.84)                          | 0.41    |
| Inflammatory bowel disease                           | 0.90 (0.10, 7.98)                   | 0.93    | 0.64 (0.23, 1.75)                         | 0.38    | 0.86 (0.41, 1.77)                          | 0.68    |

\*Shaded cells denote the statistical significance (p-value ≤ 0.05) of ORs

Supplemental Table 3a: Comparison of outcomes by risk factors in community-associated/community-onset CDI cohort and matched controls\*

| Cohort                                               | 30-day all-cause re-hospitalization |                | 30-day all-cause mortality post-admission |                | 180-day all-cause mortality post-admission |                |
|------------------------------------------------------|-------------------------------------|----------------|-------------------------------------------|----------------|--------------------------------------------|----------------|
|                                                      | CDI cohort                          | Non-CDI cohort | CDI cohort                                | Non-CDI cohort | CDI cohort                                 | Non-CDI cohort |
| <b>N</b>                                             | <b>554</b>                          | <b>175</b>     | <b>1,253</b>                              | <b>199</b>     | <b>2,197</b>                               | <b>653</b>     |
| <b>Age group (years)</b>                             |                                     |                |                                           |                |                                            |                |
| 18-44                                                | **                                  | **             | 15<br>(1.2%)                              | 0<br>(0.0%)    | **                                         | **             |
| 45-64                                                | 124<br>(22.4%)                      | 19<br>(10.9%)  | 122<br>(9.7%)                             | 15<br>(7.5%)   | 255<br>(11.6%)                             | 58<br>(8.9%)   |
| 65-74                                                | 129<br>(23.3%)                      | 31<br>(17.7%)  | 210<br>(16.8%)                            | 31<br>(15.6%)  | 358<br>(16.3%)                             | 98<br>(15.0%)  |
| 75-84                                                | 146<br>(26.4%)                      | 66<br>(37.7%)  | 418<br>(33.3%)                            | 48<br>(24.1%)  | 721<br>(32.8%)                             | 170<br>(26.0%) |
| 85+                                                  | 105<br>(19.0%)                      | 55<br>(31.4%)  | 488<br>(38.9%)                            | 105<br>(52.8%) | 833<br>(37.9%)                             | 326<br>(49.9%) |
| <b>Sex</b>                                           |                                     |                |                                           |                |                                            |                |
| Female                                               | 309<br>(55.8%)                      | 92<br>(52.6%)  | 718<br>(57.3%)                            | 109<br>(54.8%) | 1,236<br>(56.3%)                           | 361<br>(55.3%) |
| Male                                                 | 245<br>(44.2%)                      | 83<br>(47.4%)  | 535<br>(42.7%)                            | 90<br>(45.2%)  | 961<br>(43.7%)                             | 292<br>(44.7%) |
| <b>Healthcare exposure in 90 days prior to onset</b> |                                     |                |                                           |                |                                            |                |
|                                                      | **                                  | **             | **                                        | **             | 52<br>(2.4%)                               | 12<br>(1.8%)   |
| <b>Healthcare exposure in year prior to onset</b>    |                                     |                |                                           |                |                                            |                |
|                                                      | 232<br>(41.9%)                      | 67<br>(38.3%)  | 495<br>(39.5%)                            | 91<br>(45.7%)  | 870<br>(39.6%)                             | 279<br>(42.7%) |
| <b>Antibiotic use in 30 days prior to onset</b>      |                                     |                |                                           |                |                                            |                |
|                                                      | 102<br>(18.4%)                      | 20<br>(11.4%)  | 323<br>(25.8%)                            | 24<br>(12.1%)  | 501<br>(22.8%)                             | 63<br>(9.6%)   |
| <b>Comorbidities</b>                                 |                                     |                |                                           |                |                                            |                |
| CVD                                                  | 319<br>(57.6%)                      | 132<br>(75.4%) | 838<br>(66.9%)                            | 152<br>(76.4%) | 1,426<br>(64.9%)                           | 472<br>(72.3%) |
| COPD                                                 | 59<br>(10.6%)                       | 28<br>(16.0%)  | 175<br>(14.0%)                            | 27<br>(13.6%)  | 290<br>(13.2%)                             | 87<br>(13.3%)  |
| CHF                                                  | 84<br>(15.2%)                       | 30<br>(17.1%)  | 248<br>(19.8%)                            | 49<br>(24.6%)  | 417<br>(19.0%)                             | 150<br>(23.0%) |
| Diabetes                                             | 60<br>(10.8%)                       | 16<br>(9.1%)   | 89<br>(7.1%)                              | 16<br>(8.0%)   | 177<br>(8.1%)                              | 53<br>(8.1%)   |
| Renal disease                                        | 132                                 | 40             | 267                                       | 49             | 464                                        | 133            |

|                                |               |               |                |               |                |                |
|--------------------------------|---------------|---------------|----------------|---------------|----------------|----------------|
|                                | (23.8%)       | (22.9%)       | (21.3%)        | (24.6%)       | (21.1%)        | (20.4%)        |
| Liver disease                  | 57<br>(10.3%) | 13<br>(7.4%)  | 78<br>(6.2%)   | 15<br>(7.5%)  | 142<br>(6.5%)  | 39<br>(6.0%)   |
| Cancer                         | 98<br>(17.7%) | 27<br>(15.4%) | 221<br>(17.6%) | 69<br>(34.7%) | 415<br>(18.9%) | 185<br>(28.3%) |
| Pulmonary circulatory disorder | 20<br>(3.6%)  | 12<br>(6.9%)  | 45<br>(3.6%)   | 15<br>(7.5%)  | 77<br>(3.5%)   | 44<br>(6.7%)   |
| Valvular disease               | 21<br>(3.8%)  | 13<br>(7.4%)  | 61<br>(4.9%)   | 10<br>(5.0%)  | 103<br>(4.7%)  | 41<br>(6.3%)   |
| Inflammatory bowel disease     | **            | **            | 51<br>(4.1%)   | 6<br>(3.0%)   | 96<br>(4.4%)   | 9<br>(1.4%)    |

\*Shaded cells denote statistically significant differences ( $p$ -value  $\leq 0.05$ ) between the CDI cohort and their matched controls

\*\* Exact counts were low, and therefore withheld from analysis due to privacy concerns



**Supplementary Table 3b: Risk factors for all-cause re-hospitalization and mortality in community-associated/community-onset CDI cohort\***

|                                                      | 30-day all-cause re-hospitalization |         | 30-day all-cause mortality post-admission |         | 180-day all-cause mortality post-admission |         |
|------------------------------------------------------|-------------------------------------|---------|-------------------------------------------|---------|--------------------------------------------|---------|
|                                                      | OR                                  | P-Value | OR                                        | P-Value | OR                                         | P-Value |
| <b>Age group (years)</b>                             |                                     |         |                                           |         |                                            |         |
| 18-44 vs 85+                                         | 1.08 (0.75, 1.56)                   | 0.68    | 0.08 (0.05, 1.34)                         | <.0001  | 0.09 (0.06, 0.13)                          | <.0001  |
| 45-64 vs 85+                                         | 1.13 (0.86, 1.48)                   | 0.39    | 0.25 (0.21, 0.31)                         | <.0001  | 0.30 (0.26, 0.34)                          | <.0001  |
| 65-74 vs 85+                                         | 1.35 (1.03, 1.75)                   | 0.027   | 0.49 (0.42, 0.58)                         | <.0001  | 0.47 (0.42, 0.54)                          | <.0001  |
| 75-84 vs 85+                                         | 1.08 (0.84, 1.39)                   | 0.54    | 0.68 (0.60, 0.78)                         | <.0001  | 0.67 (0.61, 0.75)                          | <.0001  |
| <b>Sex (reference: male)</b>                         |                                     |         |                                           |         |                                            |         |
|                                                      | 0.94 (0.79, 1.11)                   | 0.47    | 0.87 (0.77, 0.97)                         | 0.013   | 0.84 (0.77, 0.91)                          | <.0001  |
| <b>Healthcare exposure in 90 days prior to onset</b> |                                     |         |                                           |         |                                            |         |
|                                                      | 1.00 (0.57, 1.75)                   | 1.00    | 1.07 (0.75, 1.53)                         | 0.71    | 1.02 (0.77, 1.34)                          | 0.91    |
| <b>Healthcare exposure in year prior to onset</b>    |                                     |         |                                           |         |                                            |         |
|                                                      | 1.32 (1.10, 1.59)                   | 0.0029  | 1.17 (1.03, 1.32)                         | 0.012   | 1.19 (1.08, 1.30)                          | 0.0003  |
| <b>Antibiotic use in 30 days prior to onset</b>      |                                     |         |                                           |         |                                            |         |
|                                                      | 0.84 (0.67, 1.04)                   | 0.11    | 1.15 (1.01, 1.31)                         | 0.032   | 0.99 (0.89, 1.09)                          | 0.82    |
| <b>Comorbidities</b>                                 |                                     |         |                                           |         |                                            |         |
| CVD                                                  | 1.00 (0.82, 1.22)                   | 1.00    | 1.06 (0.93, 1.21)                         | 0.36    | 1.00 (0.90, 1.10)                          | 0.98    |
| COPD                                                 | 0.91 (0.69, 1.20)                   | 0.50    | 1.22 (1.04, 1.44)                         | 0.015   | 1.15 (1.01, 1.30)                          | 0.03    |
| CHF                                                  | 1.03 (0.80, 1.33)                   | 0.82    | 1.11 (0.95, 1.29)                         | 0.19    | 1.09 (0.97, 1.23)                          | 0.13    |
| Diabetes                                             | 1.30 (0.99, 1.70)                   | 0.058   | 0.82 (0.66, 1.01)                         | 0.067   | 0.94 (0.81, 1.10)                          | 0.44    |
| Renal disease                                        | 1.38 (1.12, 1.70)                   | 0.0022  | 1.02 (0.88, 1.17)                         | 0.83    | 1.03 (0.92, 1.14)                          | 0.65    |
| Liver disease                                        | 1.57 (1.19, 2.09)                   | 0.0016  | 1.38 (1.09, 1.74)                         | 0.0078  | 1.39 (1.16, 1.65)                          | 0.0002  |
| Cancer                                               | 1.37 (1.10, 1.72)                   | 0.0058  | 1.51 (1.31, 1.76)                         | <.0001  | 1.62 (1.45, 1.81)                          | <.0001  |
| Pulmonary circulatory disorder                       | 1.22 (0.77, 1.92)                   | 0.40    | 1.19 (0.88, 1.60)                         | 0.27    | 1.17 (0.93, 1.48)                          | 0.18    |
| Valvular disease                                     | 1.02 (0.65, 1.60)                   | 0.92    | 1.14 (0.87, 1.48)                         | 0.34    | 1.12 (0.91, 1.37)                          | 0.27    |
| Inflammatory bowel disease                           | 1.15 (0.86, 1.53)                   | 0.35    | 0.66 (0.50, 0.87)                         | 0.0038  | 0.69 (0.56, 0.85)                          | 0.0004  |

\*\*\*Shaded cells denote the statistical significance (p-value ≤ 0.05) of ORs

Supplemental Table 4a: Comparison of outcomes by risk factors in ACH-associated/community-onset CDI cohort and matched controls\*\*

| Cohort                                   | All-cause 30-day re-hospitalization |                | 30-day mortality |                  | 180-day mortality |                  |
|------------------------------------------|-------------------------------------|----------------|------------------|------------------|-------------------|------------------|
|                                          | CDI cohort                          | Non-CDI cohort | CDI cohort       | Non-CDI cohort   | CDI cohort        | Non-CDI cohort   |
| <b>N</b>                                 | <b>202</b>                          | <b>26</b>      | <b>637</b>       | <b>1,758</b>     | <b>1,024</b>      | <b>2,392</b>     |
| <b>Age group (years)</b>                 |                                     |                |                  |                  |                   |                  |
| 18-44                                    | 5<br>(2.5%)                         | 3<br>(11.5%)   | **               | **               | 6<br>(0.6%)       | 19<br>(0.8%)     |
| 45-64                                    | 69<br>(34.2%)                       | 3<br>(11.5%)   | 78<br>(12.2%)    | 233<br>(13.3%)   | 144<br>(14.1%)    | 311<br>(13.0%)   |
| 65-74                                    | 54<br>(26.7%)                       | 3<br>(11.5%)   | 127<br>(19.9%)   | 390<br>(22.2%)   | 234<br>(22.9%)    | 530<br>(22.2%)   |
| 75-84                                    | 57<br>(28.2%)                       | 14<br>(53.8%)  | 255<br>(40.0%)   | 681<br>(38.7%)   | 384<br>(37.5%)    | 942<br>(39.4%)   |
| 85+                                      | 17<br>(8.4%)                        | 3<br>(11.5%)   | 176<br>(27.6%)   | 443<br>(25.2%)   | 256<br>(25.0%)    | 590<br>(24.7%)   |
| <b>Sex</b>                               |                                     |                |                  |                  |                   |                  |
| Female                                   | 106<br>(52.5%)                      | 13<br>(50.0%)  | 305<br>(47.9%)   | 812<br>(46.2%)   | 480<br>(46.9%)    | 1,108<br>(46.3%) |
| Male                                     | 96<br>(47.5%)                       | 13<br>(50.0%)  | 332<br>(52.1%)   | 946<br>(53.8%)   | 544<br>(53.1%)    | 1,284<br>(53.7%) |
| Antibiotic use in 30 days prior to onset | 89<br>(44.1%)                       | 9<br>(34.6%)   | 326<br>(51.2%)   | 649<br>(36.9%)   | 506<br>(49.4%)    | 872<br>(36.5%)   |
| <b>Comorbidities</b>                     |                                     |                |                  |                  |                   |                  |
| CVD                                      | 151<br>(74.8%)                      | 20<br>(76.9%)  | 515<br>(80.8%)   | 1,354<br>(77.0%) | 813<br>(79.4%)    | 1,833<br>(76.6%) |
| COPD                                     | 36<br>(17.8%)                       | 6<br>(23.1%)   | 115<br>(18.1%)   | 269<br>(15.3%)   | 179<br>(17.5%)    | 359<br>(15.0%)   |
| CHF                                      | 47<br>(23.3%)                       | 8<br>(30.8%)   | 181<br>(28.4%)   | 492<br>(28.0%)   | 275<br>(26.9%)    | 644<br>(26.9%)   |
| Diabetes                                 | 22<br>(10.9%)                       | 3<br>(11.5%)   | 75<br>(11.8%)    | 203<br>(11.5%)   | 119<br>(11.6%)    | 277<br>(11.6%)   |
| Renal disease                            | 56<br>(22.7%)                       | 3<br>(11.5%)   | 200<br>(31.4%)   | 459<br>(26.1%)   | 327<br>(31.9%)    | 608<br>(25.4%)   |
| Liver disease                            | 27<br>(13.4%)                       | 3<br>(11.5%)   | 46<br>(7.2%)     | 144<br>(8.2%)    | 77<br>(7.5%)      | 188<br>(7.9%)    |
| Cancer                                   | 48                                  | 8              | 183              | 630              | 304               | 877              |

|                                |              |              |              |               |              |               |
|--------------------------------|--------------|--------------|--------------|---------------|--------------|---------------|
|                                | (23.8%)      | (30.8%)      | (28.7%)      | (35.8%)       | (29.7%)      | (35.4%)       |
| Pulmonary circulatory disorder | 12<br>(5.9%) | 3<br>(11.5%) | 54<br>(8.5%) | 132<br>(7.5%) | 74<br>(7.2%) | 171<br>(7.1%) |
| Valvular disease               | 11<br>(5.4%) | 3<br>(11.5%) | 59<br>(9.3%) | 142<br>(8.1%) | 92<br>(9.0%) | 187<br>(7.8%) |
| Inflammatory bowel disease     | 18<br>(8.9%) | 0<br>(0%)    | 32<br>(5.0%) | 61<br>(3.5%)  | 50<br>(4.9%) | 83<br>(3.5%)  |

\*Italicized cells denote statistically significant differences (p-value ≤ 0.05) between the CDI cohort and their matched controls

\*\* Exact counts were low, and therefore withheld from analysis due to privacy concerns

**Supplementary Table 4b: Risk factors for all-cause re-hospitalization and mortality in ACH-associated/community-onset CDI cohort\***

|                                                 | 30-day all-cause re-hospitalization |         | 30-day all-cause mortality post-admission |         | 180-day all-cause mortality post-admission |         |
|-------------------------------------------------|-------------------------------------|---------|-------------------------------------------|---------|--------------------------------------------|---------|
|                                                 | OR                                  | P-Value | OR                                        | P-Value | OR                                         | P-Value |
| <b>Age group (years)</b>                        |                                     |         |                                           |         |                                            |         |
| 18-44 vs 85+                                    | 2.69 (1.04, 6.95)                   | 0.04    | 0.04 (0.006, 0.29)                        | 0.0014  | 0.16 (0.07, 0.38)                          | <.0001  |
| 45-64 vs 85+                                    | 4.62 (2.66, 8.03)                   | <.0001  | 0.46 (0.35, 0.61)                         | <.0001  | 0.57 (0.46, 0.71)                          | <.0001  |
| 65-74 vs 85+                                    | 2.77 (1.58, 4.84)                   | 0.0004  | 0.58 (0.46, 0.74)                         | <.0001  | 0.73 (0.61, 0.87)                          | 0.0007  |
| 75-84 vs 85+                                    | 2.10 (1.22, 3.64)                   | 0.0078  | 0.83 (0.68, 1.01)                         | 0.065   | 0.85 (0.72, 1.00)                          | 0.047   |
| <b>Sex (reference: male)</b>                    | 1.20 (0.91, 1.60)                   | 0.20    | 0.90 (0.77, 1.06)                         | 0.20    | 0.88 (0.78, 1.00)                          | 0.046   |
| <b>Antibiotic use in 30 days prior to onset</b> | 1.00 (0.76, 1.33)                   | 0.99    | 1.10 (0.94, 1.29)                         | 0.23    | 1.05 (0.92, 1.19)                          | 0.47    |
| <b>Comorbidities</b>                            |                                     |         |                                           |         |                                            |         |
| CVD                                             | 1.19 (0.83, 1.70)                   | 0.34    | 1.03 (0.83, 1.27)                         | 0.80    | 1.01 (0.85, 1.19)                          | 0.94    |
| COPD                                            | 1.04 (0.72, 1.50)                   | 0.83    | 1.03 (0.84, 1.26)                         | 0.80    | 1.01 (0.86, 1.19)                          | 0.91    |
| CHF                                             | 1.06 (0.75, 1.50)                   | 0.75    | 1.05 (0.87, 1.26)                         | 0.62    | 1.01 (0.87, 1.17)                          | 0.87    |
| Diabetes                                        | 1.06 (0.68, 1.64)                   | 0.79    | 1.12 (0.87, 1.42)                         | 0.38    | 1.10 (0.91, 1.33)                          | 0.34    |
| Renal disease                                   | 1.03 (0.74, 1.42)                   | 0.87    | 1.09 (0.92, 1.30)                         | 0.32    | 1.15 (1.00, 1.31)                          | 0.048   |
| Liver disease                                   | 1.57 (1.04, 2.37)                   | 0.031   | 1.13 (0.84, 1.54)                         | 0.42    | 1.13 (0.89, 1.42)                          | 0.33    |
| Cancer                                          | 0.89 (0.64, 1.24)                   | 0.50    | 1.40 (1.17, 1.67)                         | 0.0002  | 1.40 (1.22, 1.61)                          | <.0001  |
| Pulmonary circulatory disorder                  | 1.20 (0.67, 2.12)                   | 0.54    | 1.55 (1.16, 2.06)                         | 0.0027  | 1.31 (1.03, 1.66)                          | 0.029   |
| Valvular disease                                | 0.98 (0.54, 1.75)                   | 0.93    | 1.05 (0.79, 1.39)                         | 0.73    | 1.09 (0.87, 1.36)                          | 0.45    |
| Inflammatory bowel disease                      | 1.21 (0.73, 2.01)                   | 0.47    | 0.96 (0.67, 1.38)                         | 0.84    | 0.88 (0.66, 1.17)                          | 0.39    |

\*Shaded cells denote the statistical significance (p-value ≤ 0.05) of ORs
